# Supplementary material for: Marine Sediment-Derived Streptomyces Bacteria from British Columbia, Canada Are a Promising Microbiota Resource for the Discovery of Antimicrobial Natural Products
Source: PubMed Central journal article supplement (PMC3794959; doi:10.1371/journal.pone.0077078), 2013-10-10

## SUPPORTING INFORMATION

### Marine sediment-derived *Streptomyces* bacteria from British Columbia, Canada are a promising microbiota resource for the discovery of antimicrobial natural products

Doralyn S. Dalisay<sup>†‡</sup>, David E. Williams<sup>†</sup>, Xiao Ling Wang<sup>†</sup>, Ryan Centko<sup>†</sup>, Jessie Chen<sup>†</sup>,  
Raymond J. Andersen<sup>†\*</sup>

<sup>†</sup>Departments of Chemistry and Earth, Ocean and Atmospheric Sciences, University of British Columbia, Vancouver, B.C., Canada, V6T 1Z3

<sup>‡</sup>Present address: Institute of Biological Chemistry, Washington State University, Pullman, WA 99164 USA

\* Corresponding author: raymond.andersen@ubc.ca

**Table S1.** List of *Streptomyces* isolates, isolation media, coordinates of the collection site and their corresponding closely related type strains.

**Table S2.** Descriptions of the aerial and substrate mycelia, and soluble pigment

**Table S3.** NMR Data for Novobiocins **1-6** (600 MHz, DMSO-*d*<sub>6</sub>)

**Figure S1:** <sup>1</sup>H NMR Spectrum of Desmethyldescarbamoylnovobiocin (**2**) recorded at 600 MHz in DMSO-*d*<sub>6</sub>

**Figure S2:** <sup>13</sup>C NMR Spectrum of Desmethyldescarbamoylnovobiocin (**2**) recorded at 150 MHz in DMSO-*d*<sub>6</sub>

**Figure S3:** <sup>1</sup>H NMR Spectrum of Desmethylnovobiocin (**3**) recorded at 600 MHz in DMSO-*d*<sub>6</sub>

**Figure S4:** <sup>13</sup>C NMR Spectrum of Desmethylnovobiocin (**3**) recorded at 150 MHz in DMSO-*d*<sub>6</sub>

**Figure S5:** <sup>1</sup>H NMR Spectrum of 4-Hydroxynovobiocin (**4**) recorded at 600 MHz in DMSO-*d*<sub>6</sub>

**Figure S6:** <sup>13</sup>C NMR Spectrum of 4-Hydroxynovobiocin (**4**) recorded at 150 MHz in DMSO-*d*<sub>6</sub>

**Figure S7:** <sup>1</sup>H NMR Spectrum of Desmethyldescarbamoyl-4-hydroxynovobiocin (**5**) recorded at 600 MHz in DMSO-*d*<sub>6</sub>

**Figure S8:** <sup>1</sup>H NMR Spectrum of Desmethyl-4-hydroxynovobiocin (**6**) recorded at 600 MHz in DMSO-*d*<sub>6</sub>

**Figure S9:** <sup>13</sup>C NMR Spectrum of Desmethyl-4-hydroxynovobiocin (**6**) recorded at 150 MHz in DMSO-*d*<sub>6</sub>

**Table S1.** List of *Streptomyces* isolates and coordinates of the collection site

| Strain<br>(accession #) <sup>a</sup> | Isolation<br>Medium | Collection site, depth (m)                             | Most closely related type<br>strain <sup>b</sup> |
|--------------------------------------|---------------------|--------------------------------------------------------|--------------------------------------------------|
| RJA2895 (JX535235)                   | MM5                 | BF #6 48°52'N, 125°09'W, 82 m                          | <i>S. flavofungini</i> Szabo strain              |
| RJA2910 (JX535236)                   | MM5                 | BF #5 48°52'N, 125°08'W, 80 m                          | <i>S. hawaiiensis</i> NRRL 15010                 |
| RJA2921 (JX535237)                   | MM8                 | BF #8 48°50'N, 125°13'W, 65 m                          | <i>S. deccanesis</i> DAS-139T                    |
| RJA2926 (JX535238)                   | MM5                 | BF #8 48°50'N, 125°13'W, 65 m                          | <i>S. sporoclivatus</i> LMG 20312                |
| RJA2960                              | MM5                 | IA#7 49°25'N, 122°51'W, 95 m                           | <i>S. flavofungini</i> Szabo strain              |
| RJA2961 (JF719041)                   | MM5                 | IA#12 49°26'N, 122°57'W, 65 m                          | <i>S. caeruleus</i> QD13II                       |
| RJA2969 (JX535239)                   | MM5                 | IA#12 49°26'N, 122°57'W, 65 m                          | <i>S. sampsonii</i> ATCC 25495                   |
| RJA3024                              | MM5                 | IA#19 49°24'N, 122°52'W, 35 m                          | <i>S. flavofungini</i> Szabo strain              |
| RJA3025(JX535240)                    | MM3                 | IA #1 new mud missile lost in process<br>of collecting | <i>S. rutgersensis</i> DSM 40077T                |
| RJA3040                              | MM19                | IA#19 49°24'N, 122°52'W, 35 m                          | <i>S. sampsonii</i> ATCC 25495                   |
| RJA3067                              | MM13                | IA#1 new mud missile lost in process<br>of collecting  | <i>S. rutgersensis</i> DSM 40077T                |
| RJA3074 (JX535241)                   | MM7                 | BF #7 48°52'N, 125°09'W, 82 m                          | <i>S. griseus</i> strain 52-1                    |
| RJA3265                              | MM10                | BF #8 48°50'N, 125°13'W, 65 m                          | <i>S. sampsonii</i> ATCC 25495                   |
| RJA3407                              | MM39                | HS#2 49°23'N, 123°15'W, 30 m                           | <i>S. flavofungini</i> Szabo strain              |
| RJA3410                              | MM38                | HS#2 49°23'N, 123°15'W, 30 m                           | <i>S. flavofungini</i> Szabo strain              |
| RJA3622                              | MM16                | IA#15 49°26'N, 122°52'W, 23 m                          | <i>S. sampsonii</i> ATCC 25495                   |
| RJA3937                              | MM47                | GS#1 49°31'N, 123°58'W, 146 m                          | <i>S. rutgersensis</i> DSM 40077T                |
| RJA3939                              | MM47                | GS#1 49°31'N, 123°58'W, 146 m                          | <i>S. flavofungini</i> Szabo strain              |
| RJA3948(JX535242)                    | MM47                | GS#1 49°31'N, 123°58'W, 146 m                          | <i>S. koyangensis</i> VK-A60                     |
| RJA3953                              | MM47                | GS#1 49°31'N, 123°58'W, 146 m                          | <i>S. sampsonii</i> ATCC 25495                   |
| RJA3956                              | MM5                 | GS#1 49°31'N, 123°58'W, 146 m                          | <i>S. rutgersensis</i> DSM 40077T                |
| RJA3957                              | MM5                 | GS#1 49°31'N, 123°58'W, 146 m                          | <i>S. rutgersensis</i> DSM 40077T                |
| RJA3958                              | MM5                 | GS#1 49°31'N, 123°58'W, 146 m                          | <i>S. flavofungini</i> Szabo strain              |
| RJA3972 (JF837443)                   | MM5                 | GS#1 49°31'N, 123°58'W, 146 m                          | <i>S. rubrogriseus</i> LMG20318                  |
| RJA3973                              | MM5                 | GS#1 49°31'N, 123°58'W, 146 m                          | <i>S. flavofungini</i> Szabo strain              |
| RJA3974                              | MM5                 | GS#1 49°31'N, 123°58'W, 146 m                          | <i>S. flavofungini</i> Szabo strain              |
| RJA3980                              | MM5                 | GS#1 49°31'N, 123°58'W, 146 m                          | <i>S. rutgersensis</i> DSM 40077T                |
| RJA3983 (JX535243)                   | MM5                 | GS#1 49°31'N, 123°58'W, 146 m                          | <i>S. violaceusniger</i> Tu 4113                 |
| RJA3990 (JF837445)                   | MM49                | GS#1 49°31'N, 123°58'W, 146 m                          | <i>S. speibonae</i> PK-Blue                      |
| RJA3995                              | MM48                | GS#1 49°31'N, 123°58'W, 146 m                          | <i>S. sampsonii</i> ATCC 25495                   |
| RJA3996                              | MM48                | GS#1 49°31'N, 123°58'W, 146 m                          | <i>S. flavofungini</i> Szabo strain              |
| RJA3999                              | MM50                | GS#1 49°31'N, 123°58'W, 146 m                          | <i>S. sampsonii</i> ATCC 25495                   |
| RJA4019                              | MM5                 | GS#6 49°28'N, 123°55'W, 158 m                          | <i>S. flavofungini</i> Szabo strain              |
| RJA4020 (JF510466)                   | MM5                 | GS#6 49°28'N, 123°55'W, 158 m                          | <i>S. caeruleus</i> QD13II                       |
| RJA4028                              | MM50                | GS#6 49°28'N, 123°55'W, 158 m                          | <i>S. sampsonii</i> ATCC 25495                   |
| RJA4037                              | MM49                | GS#12 49°21'N, 123°26'W, 70 m                          | <i>S. sampsonii</i> ATCC 25495                   |
| RJA4038(JX535244)                    | MM49                | GS#5 49°28'N, 123°56'W, 143 m                          | <i>S. flocculus</i> NBRC 13041                   |
| RJA4040                              | MM47                | GS#5 49°28'N, 123°56'W, 143 m                          | <i>S. rutgersensis</i> DSM 40077T                |
| RJA4053                              | MM47                | GS#12 49°21'N, 123°26'W, 70 m                          | <i>S. flavofungini</i> Szabo strain              |
| RJA4054                              | MM47                | GS#3 49°31'N, 123°59'W, 102 m                          | <i>S. sampsonii</i> ATCC 25495                   |
| RJA4055(JX535245)                    | MM47                | GS#3 49°31'N, 123°59'W, 102 m                          | <i>S. drozdowiczii</i> NRRL B-24297              |
| RJA4056                              | MM47                | GS#3 49°31'N, 123°59'W, 102 m                          | <i>S. rutgersensis</i> DSM 40077T                |
| RJA4060                              | MM47                | GS#6 49°28'N, 123°55'W, 158 m                          | <i>S. sampsonii</i> ATCC 25495                   |
| RJA4068 (JX535246)                   | MM47                | HS#1 49°23'N, 123°15'W, 15 m                           | <i>S. anulatus</i> strain Malaysia               |
| RJA4077                              | MM17                | HS#2 49°23'N, 123°15'W, 30 m                           | <i>S. flavofungini</i> Szabo strain              |
| RJA4079                              | MM17                | HS#2 49°23'N, 123°15'W, 30 m                           | <i>S. flavofungini</i> Szabo strain              |
| RJA4081                              | MM1                 | GS#11 49°23'N, 123°25'W, 70 m                          | <i>S. flavofungini</i> Szabo strain              |

BF = Bamfield; IA = Indian Arm; GS = Georgia Strait; HS = Howe Sound

<sup>a</sup>NCBI accession number.

<sup>b</sup>The corresponding type of strain had a level of similarity greater than or equal to 98.5%.

**Table S2.** Descriptions of the aerial and substrate mycelia, and soluble pigment

| Strain  | Collection site, depth (m) | Color on MM1 agar |                    |                 |
|---------|----------------------------|-------------------|--------------------|-----------------|
|         |                            | Aerial spore mass | Substrate mycelium | Soluble pigment |
| RJA2895 | BF #6, 82 m                | medium-grey       | deep brown         | reddish- brown  |
| RJA2910 | BF #5, 80 m                | white             | black              | reddish- brown  |
| RJA2921 | BF #8, 65 m                | white             | yellow             | none            |
| RJA2926 | BF #8, 65 m                | grey              | white              | none            |
| RJA2960 | IA #7, 95 m                | yellow-pink       | light yellow       | none            |
| RJA2961 | IA #12, 65 m               | yellow-pink       | white              | none            |
| RJA2969 | IA #12, 65 m               | yellow-pink       | dark brown         | reddish- brown  |
| RJA3024 | IA #19, 35 m               | yellow-pink       | light yellow       | none            |
| RJA3025 | IA #1                      | yellow-pink       | light yellow       | none            |
| RJA3040 | IA #19, 35 m               | white             | light yellow       | none            |
| RJA3067 | IA #1                      | medium grey       | dark brown         | reddish- brown  |
| RJA3074 | BF #7, 82 m                | yellow            | yellow-pink        | yellow          |
| RJA3265 | BF #8, 65 m                | white             | yellow             | none            |
| RJA3407 | HS #2, 30 m                | yellow            | yellow             | none            |
| RJA3410 | HS #2, 30 m                | yellow-pink       | light orange       | none            |
| RJA3622 | IA #15, 23 m               | yellow pink       | dark brown         | reddish- brown  |
| RJA3937 | GS #1, 146 m               | yellow pink       | reddish brown      | brown           |
| RJA3939 | GS #1, 146 m               | yellow-pink       | reddish brown      | brown           |
| RJA3948 | GS #1, 146 m               | yellow            | light brown        | none            |
| RJA3953 | GS #1, 146 m               | grey              | dark brown         | reddish- brown  |
| RJA3956 | GS #1, 146 m               | white             | white              | none            |
| RJA3957 | GS #1, 146 m               | grey              | dark brown         | reddish- brown  |
| RJA3958 | GS #1, 146 m               | yellow-pink       | dark brown         | reddish- brown  |
| RJA3972 | GS #1, 146 m               | grey              | dark brown         | reddish- brown  |
| RJA3973 | GS #1, 146 m               | light-pink        | dark brown         | reddish- brown  |
| RJA3974 | GS #1, 146 m               | light-pink        | dark brown         | reddish- brown  |
| RJA3980 | GS #1, 146 m               | light-pink        | dark brown         | reddish- brown  |
| RJA3983 | GS #1, 146 m               | white             | light yellow       | none            |
| RJA3990 | GS #1, 146 m               | white             | light yellow       | none            |
| RJA3995 | GS #1, 146 m               | light-pink        | dark brown         | reddish- brown  |
| RJA3996 | GS #1, 146 m               | white             | yellow-pink        | none            |
| RJA3999 | GS #1, 146 m               | grey              | dark brown         | reddish- brown  |
| RJA4019 | GS #6, 158 m               | yellow-pink       | dark brown         | reddish- brown  |
| RJA4020 | GS #6, 158 m               | grey              | dark brown         | reddish- brown  |
| RJA4028 | GS #6, 158 m               | yellow-pink       | dark brown         | reddish- brown  |
| RJA4037 | GS #12, 70 m               | yellow-pink       | dark brown         | reddish- brown  |
| RJA4038 | GS #5, 143 m               | white             | light brown        | none            |
| RJA4040 | GS #5, 143 m               | yellow-pink       | yellow-pink        | none            |
| RJA4053 | GS #12, 70 m               | yellow-pink       | Light brown        | none            |
| RJA4054 | GS #3, 102 m               | yellow-pink       | Dark brown         | reddish- brown  |
| RJA4055 | GS #3, 102 m               | white             | yellow-pink        | none            |
| RJA4056 | GS #3, 102 m               | white             | yellow-pink        | none            |
| RJA4060 | GS #6, 158 m               | yellow-pink       | dark brown         | reddish- brown  |
| RJA4068 | HS #1, 15 m                | medium grey       | light brown        | light amber     |
| RJA4077 | HS #2, 30 m                | yellow-pink       | light brown        | Light amber     |
| RJA4079 | HS #2, 30 m                | yellow-pink       | dark brown         | reddish- brown  |
| RJA4081 | GS #11, 70 m               | yellow-pink       | dark brown         | reddish- brown  |

BF = Bamfield; IA = Indian Arm; GS = Georgia Strait; HS = Howe Sound

**Table S3.** NMR Data for Novobiocins **1-6** (600 MHz, DMSO-*d*<sub>6</sub>).<sup>a</sup>

| Atom #                        | $\delta_C/\delta_N^b$ |       |        |        |       |        | $\delta_H$ (J in Hz) |                     |                     |                     |                       |                     |
|-------------------------------|-----------------------|-------|--------|--------|-------|--------|----------------------|---------------------|---------------------|---------------------|-----------------------|---------------------|
|                               | 1                     | 2     | 3      | 4      | 5     | 6      | 1                    | 2                   | 3                   | 4                   | 5                     | 6                   |
| 1                             | 124.2                 | 124.3 | 124.2  | 123.7  | no    | 123.7  |                      |                     |                     |                     |                       |                     |
| 2                             | 129.8                 | 129.8 | 129.8  | 120.6  | 120.6 | 120.6  | 7.74, s              | 7.73, s             | 7.74, s             | 7.30, s             | 7.30, s               | 7.30, s             |
| 3                             | 127.2                 | 127.2 | 127.2  | 127.5  | 127.5 | 127.5  |                      |                     |                     |                     |                       |                     |
| 4                             | 158.3                 | 158.2 | 158.3  | 146.7  | 146.4 | 146.7  |                      |                     |                     |                     |                       |                     |
| 5                             | 114.2                 | 114.2 | 114.2  | 144.3  | 144.3 | 144.3  |                      |                     |                     |                     |                       |                     |
| 6                             | 127.4                 | 127.4 | 127.4  | 113.1  | 113.0 | 113.1  | 7.71, d (8.2)        | 7.70, d (8.4)       | 7.71, d (8.4)       | 7.29, s             | 7.29, s               | 7.29, s             |
| 7                             | 28.1                  | 28.1  | 28.1   | 28.3   | 28.3  | 28.3   | 3.26, d (7.2)        | 3.26, d (7.2)       | 3.26, d (7.3)       | 3.26, d (7.0)       | 3.26, d (7.3)         | 3.26, d (7.2)       |
| 8                             | 122.6                 | 122.6 | 122.6  | 122.8  | 122.8 | 122.8  | 5.30, bt (7.2)       | 5.30, bt (7.2)      | 5.30, bt (7.3)      | 5.30, bt (7.0)      | 5.30, bt (7.3)        | 5.30, bt, (7.2)     |
| 9                             | 131.5                 | 131.4 | 131.5  | 131.1  | 131.2 | 131.1  |                      |                     |                     |                     |                       |                     |
| 10                            | 17.7                  | 17.7  | 17.7   | 17.7   | 17.7  | 17.7   | 1.69, bs             | 1.69, bs            | 1.69, bs            | 1.69, bs            | 1.69, bs              | 1.70, s             |
| 11                            | 25.6                  | 25.6  | 25.6   | 25.6   | 25.6  | 25.6   | 1.69, bs             | 1.69, bs            | 1.69, bs            | 1.68, bs            | 1.68, bs              | 1.68, bs            |
| 12                            | 166.5                 | 166.4 | 166.5  | 166.7  | 166.5 | 166.7  |                      |                     |                     |                     |                       |                     |
| 4-OH                          |                       |       |        |        |       |        | 10.05, s             | 10.03, s            | 10.05, s            | 8.91, s             | 8.90, s               | 8.91, s             |
| R (H/OH)                      |                       |       |        |        |       |        | 6.85, d (8.2)        | 6.84, d (8.4)       | 6.85, d (8.4)       | 9.61, s             | 9.60, s               | 9.61, s             |
| 1'                            | 160.6                 | 160.8 | 160.7  | 160.6  | no    | 160.6  |                      |                     |                     |                     |                       |                     |
| 2'                            | 101.5                 | no    | 101.4  | 101.7  | no    | 101.6  |                      |                     |                     |                     |                       |                     |
| 3'                            | 159.3                 | no    | 159.3  | 158.9  | no    | 158.9  |                      |                     |                     |                     |                       |                     |
| 4'                            | 121.8                 | 121.8 | 121.8  | 121.8  | 121.8 | 121.8  | 7.73, d (8.9)        | 7.71, d (8.4)       | 7.73, d (9.1)       | 7.73, d (9.1)       | 7.71, d (8.6)         | 7.73, d (9.0)       |
| 5'                            | 110.03 <sup>1</sup>   | 109.9 | 110.04 | 110.0  | 110.0 | 110.0  | 7.16, d (8.9)        | 7.15, d (8.4)       | 7.16, d (9.1)       | 7.16, d (9.1)       | 7.15, nd <sup>c</sup> | 7.16, d (9.0)       |
| 6'                            | 156.9                 | 157.2 | 157.1  | 156.9  | 157.5 | 157.1  |                      |                     |                     |                     |                       |                     |
| 7'                            | 112.8                 | 112.5 | 112.8  | 112.8  | 112.5 | 112.8  |                      |                     |                     |                     |                       |                     |
| 8'                            | 150.6                 | 150.6 | 150.6  | 150.5  | 150.6 | 150.5  |                      |                     |                     |                     |                       |                     |
| 9'                            | 110.05 <sup>1</sup>   | no    | 109.96 | 110.8  | no    | 110.0  |                      |                     |                     |                     |                       |                     |
| 10'                           | 8.3                   | 8.4   | 8.32   | 8.3    | 8.3   | 8.3    | 2.21, s              | 2.19, s             | 2.22, s             | 2.21, s             | 2.19, s               | 2.22, s             |
| 2'-NH                         | -274.1                | no    | -274.6 | -272.9 | no    | -273.0 | 9.23, s              | 9.17, bs            | 9.23, s             | 9.18, s             | 9.15, bs              | 9.17, bs            |
| 3'-OH                         |                       |       |        |        |       |        | 11.96, s             | 11.95, s            | 11.95, s            | 12.06, s            | 12.04, s              | 12.05, s            |
| 1''                           | 98.4                  | 98.5  | 98.6   | 98.5   | 98.5  | 98.6   | 5.53, d (2.7)        | 5.52, d (1.4)       | 5.52, d (2.3)       | 5.53, d (2.0)       | 5.52, bs              | 5.52, d (2.3)       |
| 2''                           | 68.7                  | 70.4  | 68.3   | 68.7   | 70.4  | 68.3   | 4.07, t (2.7)        | 3.92, m             | 4.07, m             | 4.07, m             | 3.92, m               | 4.07, m             |
| 3''                           | 70.3                  | 67.5  | 70.4   | 70.3   | 67.5  | 70.4   | 5.15, dd (10.0, 2.7) | 3.89, m             | 5.05, dd (9.9, 3.1) | 5.15, dd (9.4, 3.0) | 3.89, m               | 5.05, dd (9.8, 3.2) |
| 4''                           | 80.7                  | 72.3  | 69.8   | 80.7   | 72.3  | 69.8   | 3.47, d (10.0)       | 3.57, dd (9.1, 5.4) | 3.75, d (9.9)       | 3.47, d(9.4)        | 3.57, dd (9.1, 5.4)   | 3.75, dd (9.8, 6.2) |
| 5''                           | 78.1                  | 78.5  | 78.9   | 78.1   | 78.3  | 78.9   |                      |                     |                     |                     |                       |                     |
| 6''                           | 22.7                  | 22.5  | 22.7   | 22.7   | 22.5  | 22.7   | 1.04, s              | 1.01, s             | 1.06, s             | 1.04, s             | 1.01, s               | 1.05, s             |
| 7''                           | 28.4                  | 28.6  | 28.4   | 28.4   | 28.6  | 28.4   | 1.26, s              | 1.21, s             | 1.23, s             | 1.26, s             | 1.21, s               | 1.23, s             |
| 2''-OH                        |                       |       |        |        |       |        | 5.60, bs             | 5.16, d (4.4)       | no                  | 5.59, bs            | 5.16, d (4.4)         | 5.45, d (5.1)       |
| R' (-C(O)NH <sub>2</sub> /OH) | 156.3                 |       | 156.6  | 156.3  |       | 156.6  |                      |                     |                     |                     |                       |                     |
| R' (-C(O)NH <sub>2</sub> /OH) | -302.6                |       | -302.9 | -302.9 |       | -302.5 | 6.73, bs/6.52, bs    | 4.79, d (5.4)       | 6.50, bs/6.50, bs   | 6.73, bs/6.52, bs   | 4.79, d (5.4)         | 6.49, bs/6.49, bs   |
| R'' (Me/OH)                   | 61.0                  |       |        | 61.0   |       |        | 3.46, s              | 4.96, d (5.4)       | no                  | 3.46, s             | 4.96, d (5.4)         | 5.14, d (6.2)       |

<sup>a</sup>Numbering according to reference 43.<sup>b</sup>The <sup>15</sup>N assignments were not calibrated with an external standard. The  $\delta$  value has an accuracy of about 1 ppm in reference to CH<sub>3</sub>NO<sub>2</sub> (0 ppm) and are assigned on the basis of <sup>15</sup>NHSQC and <sup>15</sup>NrHMQC correlations.<sup>c</sup>Multiplicity not determined due to overlapping of signal with the residual TFA signal.<sup>1</sup>Assignments within a column are interchangeable.

no – not observed.

**Figure S1:**  $^1\text{H}$  NMR Spectrum of Desmethyldescarbamoylnovobiocin (**2**) recorded at 600 MHz in  $\text{DMSO-}d_6$

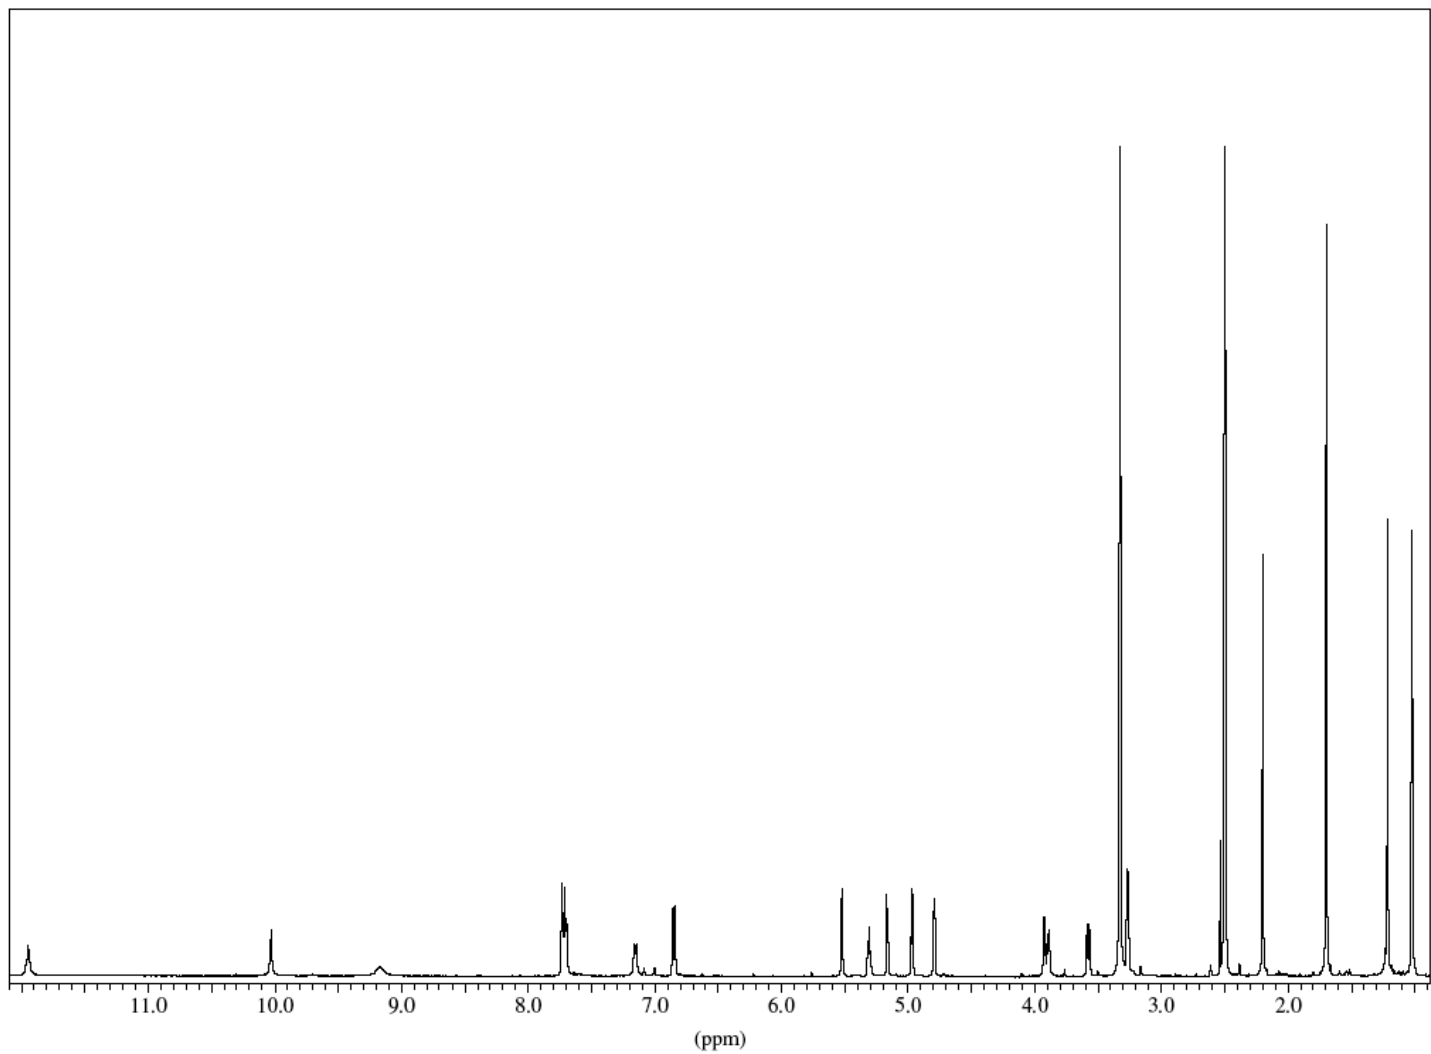

**Figure S2:**  $^{13}\text{C}$  NMR Spectrum of Desmethyldescarbamoynovobiocin (**2**) recorded at 150 MHz in  $\text{DMSO-}d_6$

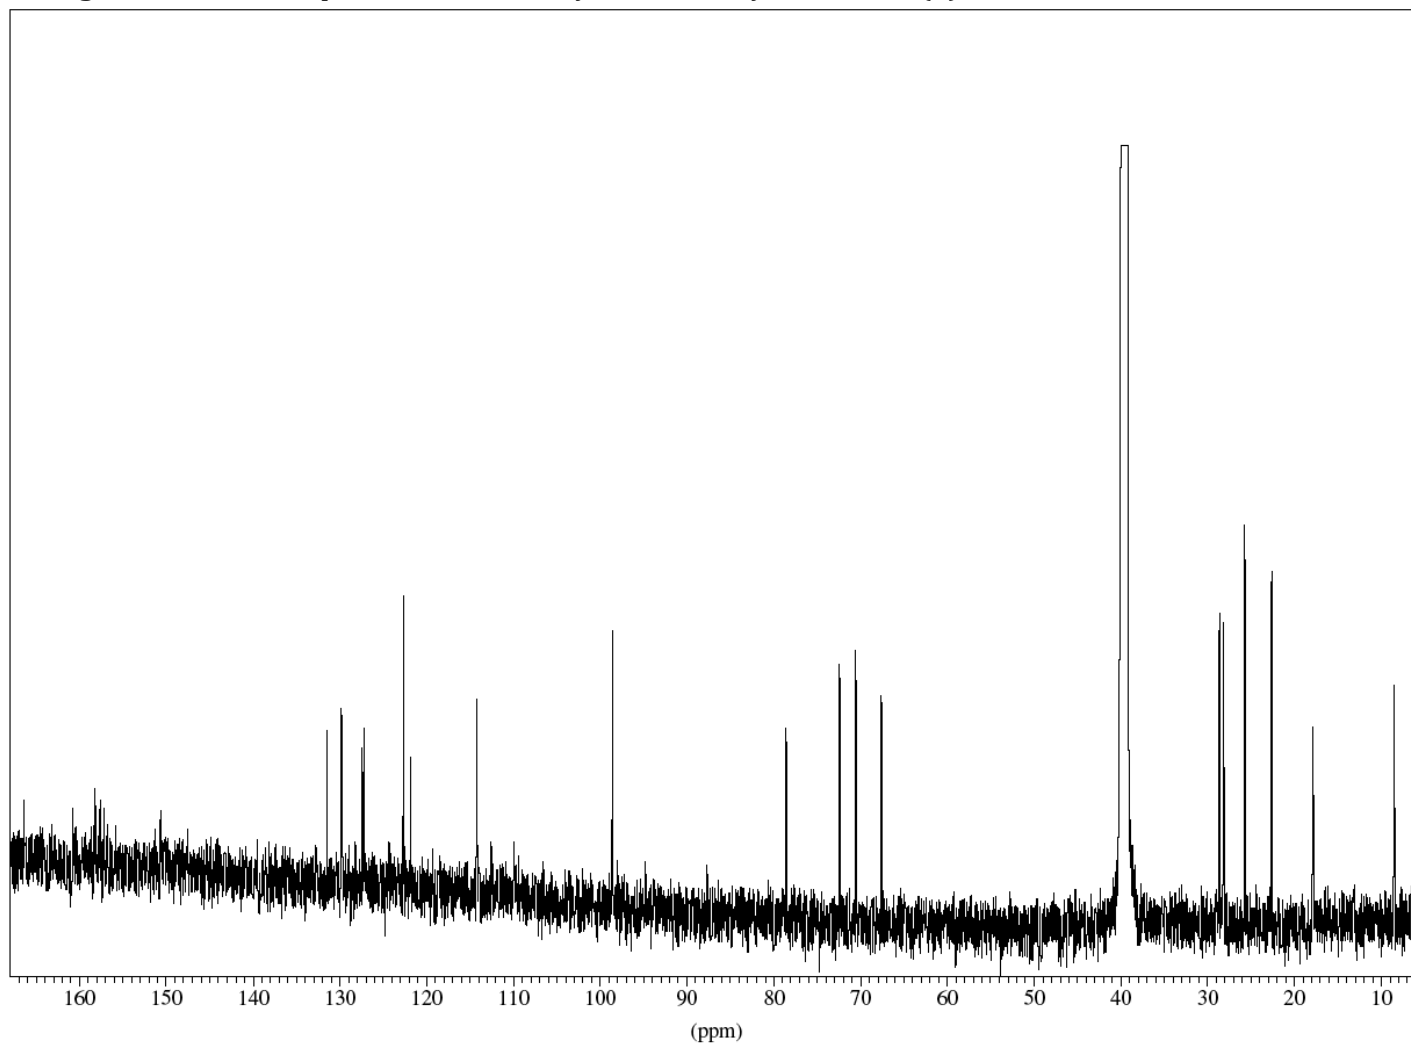

**Figure S3:**  $^1\text{H}$  NMR Spectrum of Desmethylnovobiocin (**3**) recorded at 600 MHz in  $\text{DMSO-}d_6$

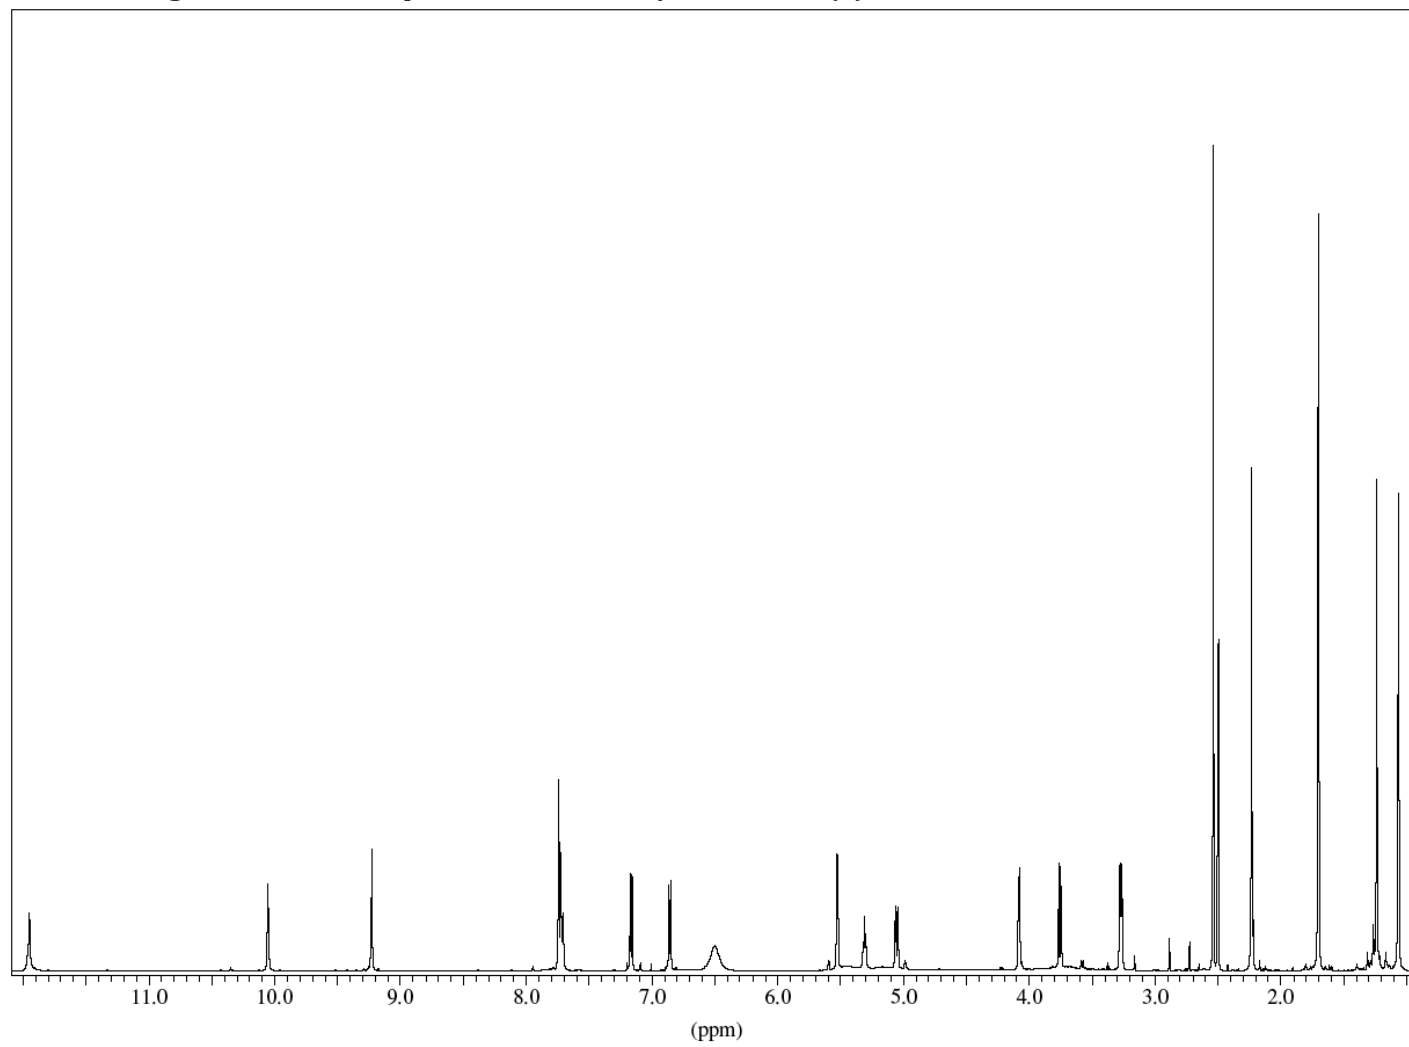

**Figure S4:**  $^{13}\text{C}$  NMR Spectrum of Desmethylnovobiocin (**3**) recorded at 150 MHz in  $\text{DMSO-}d_6$

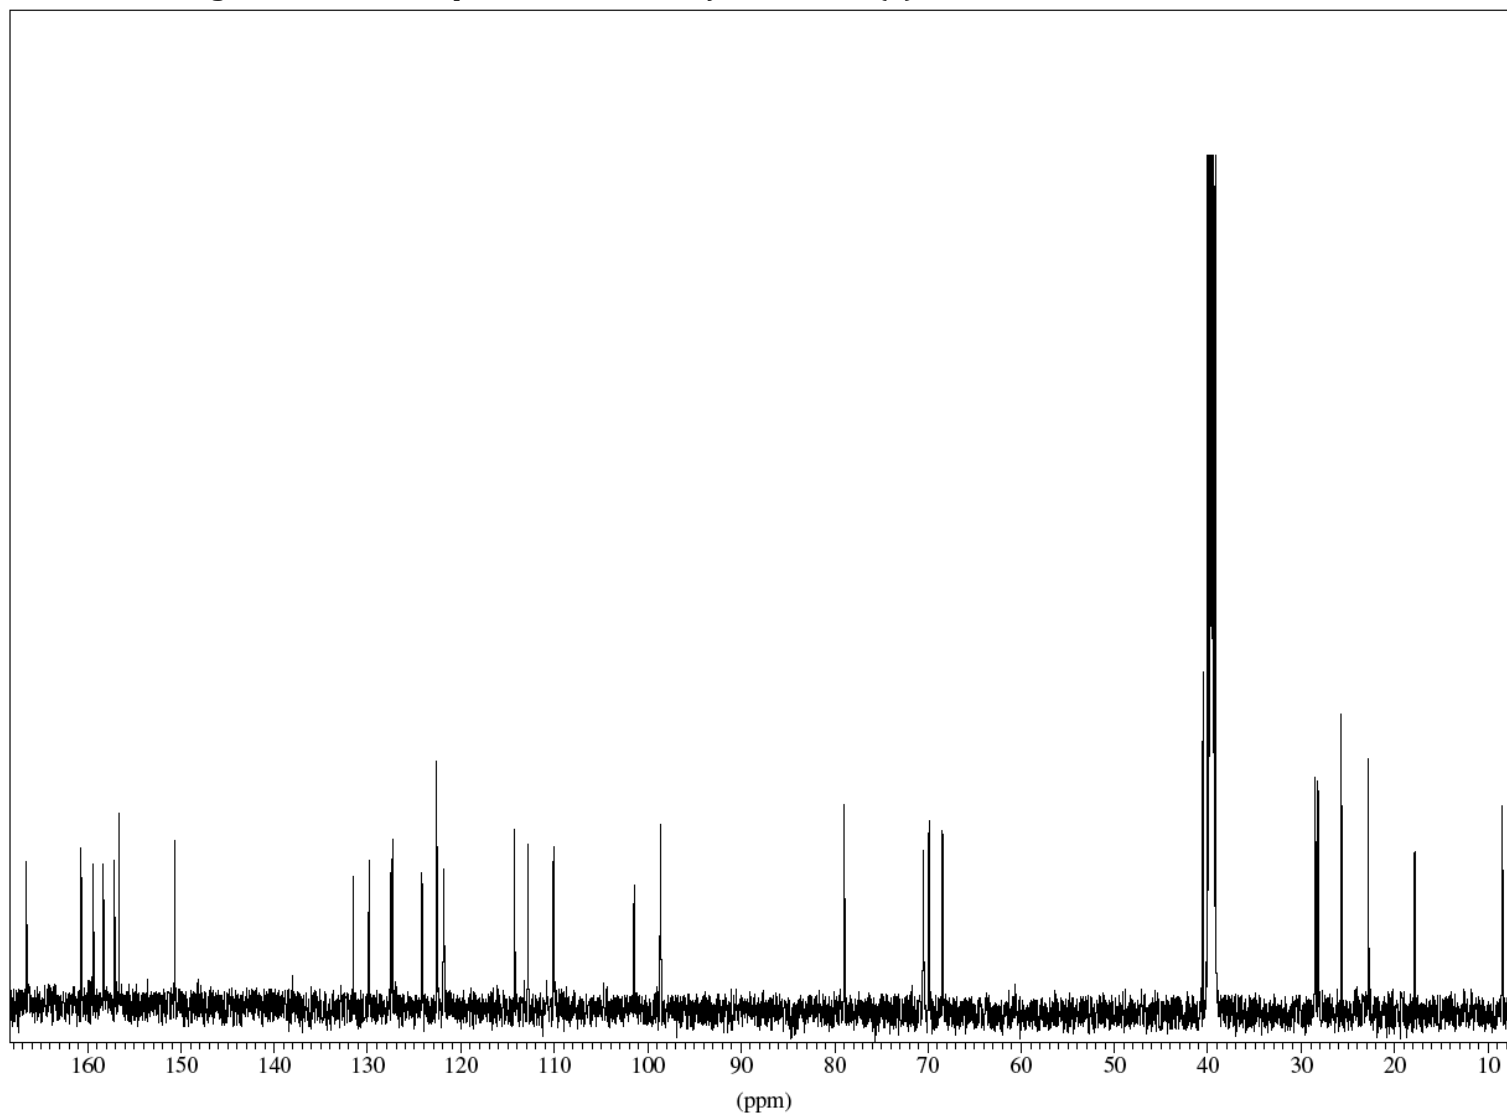



**Figure S5:**  $^1\text{H}$  NMR Spectrum of 4-Hydroxynovobiocin (**4**) recorded at 600 MHz in  $\text{DMSO-}d_6$

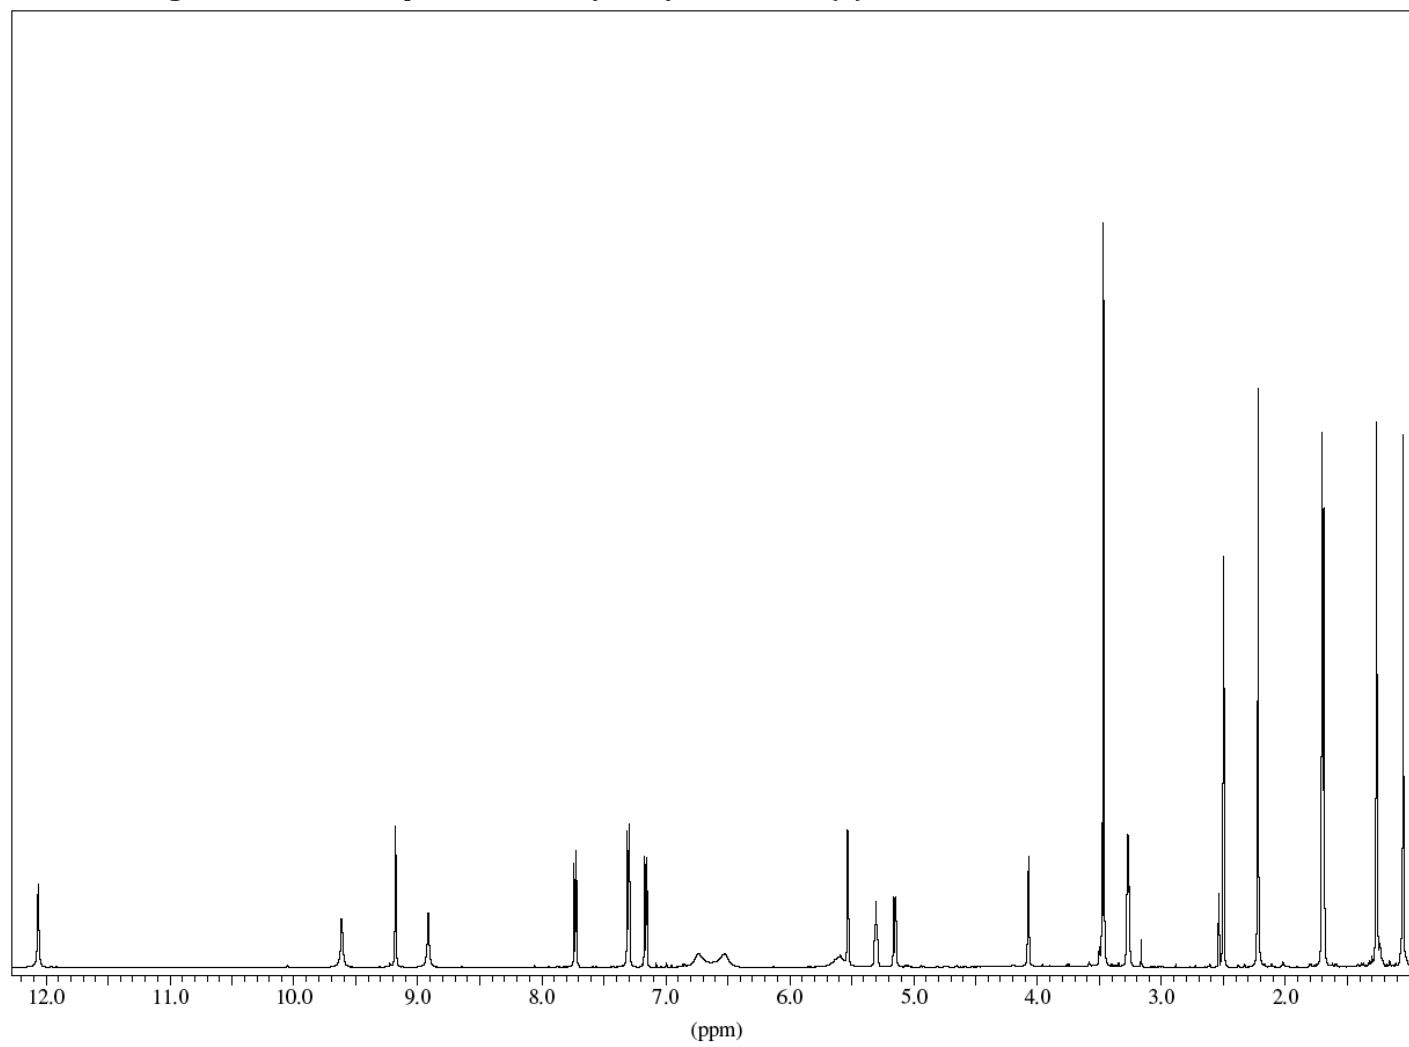

**Figure S6:**  $^{13}\text{C}$  NMR Spectrum of 4-Hydroxynovobiocin (**4**) recorded at 150 MHz in  $\text{DMSO-}d_6$

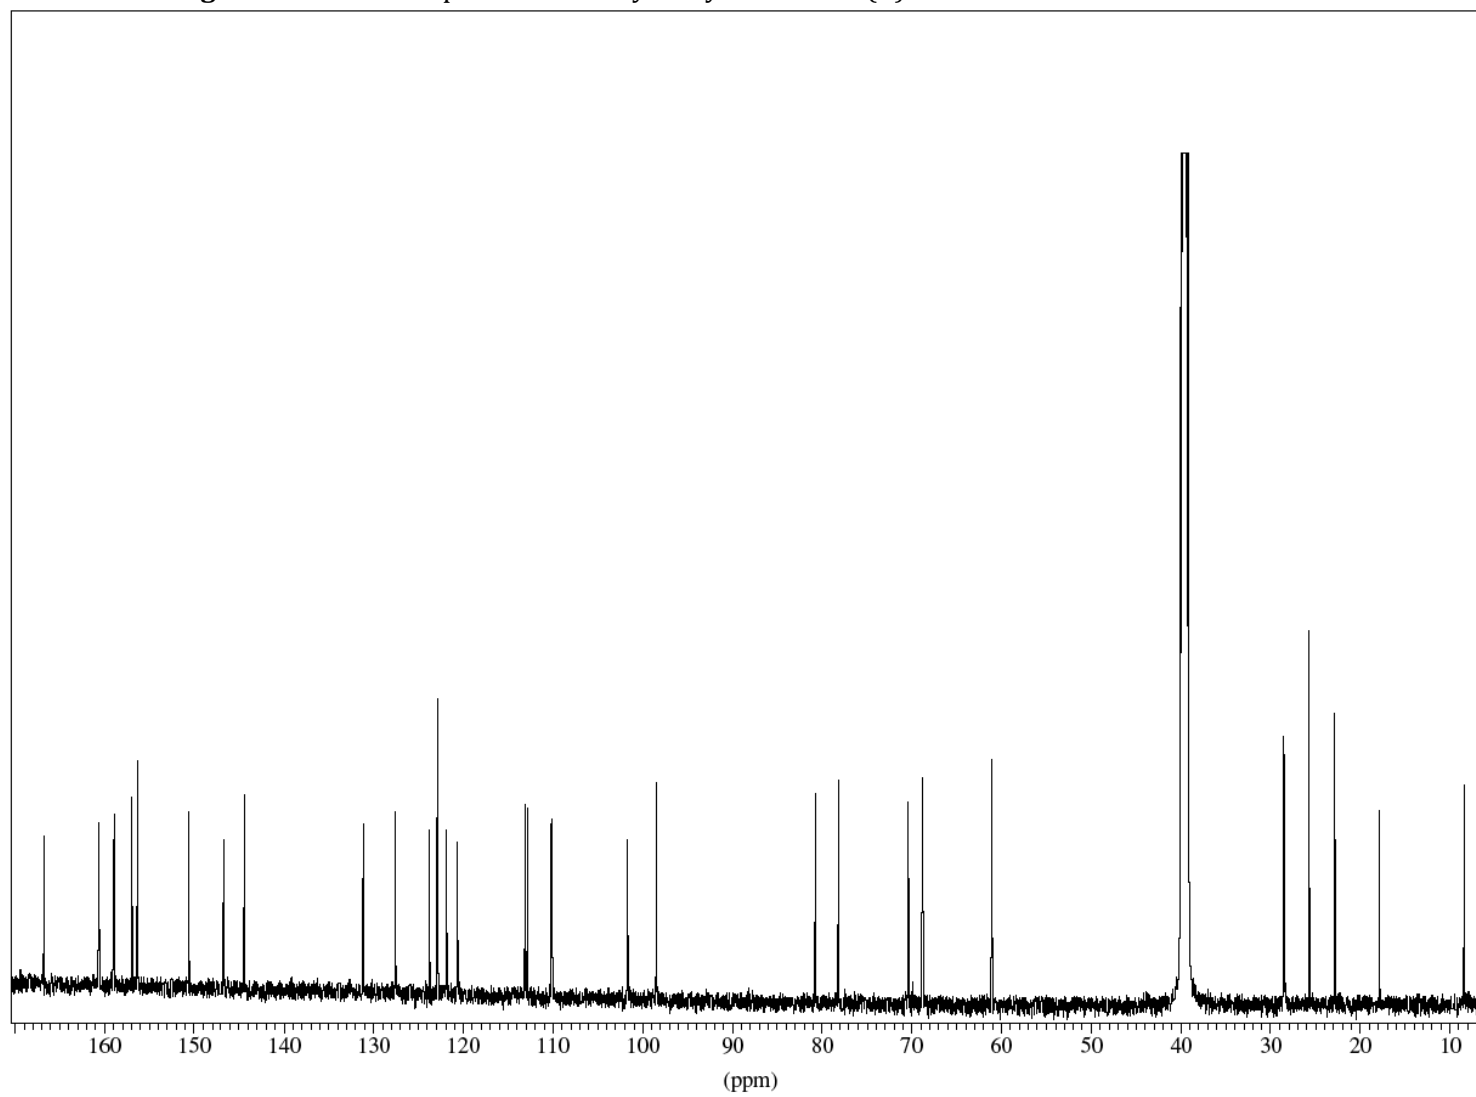

**Figure S7:**  $^1\text{H}$  NMR Spectrum of Desmethyldescarbamoyl-4-hydroxynovobiocin (**5**) recorded at 600 MHz in  $\text{DMSO-}d_6$

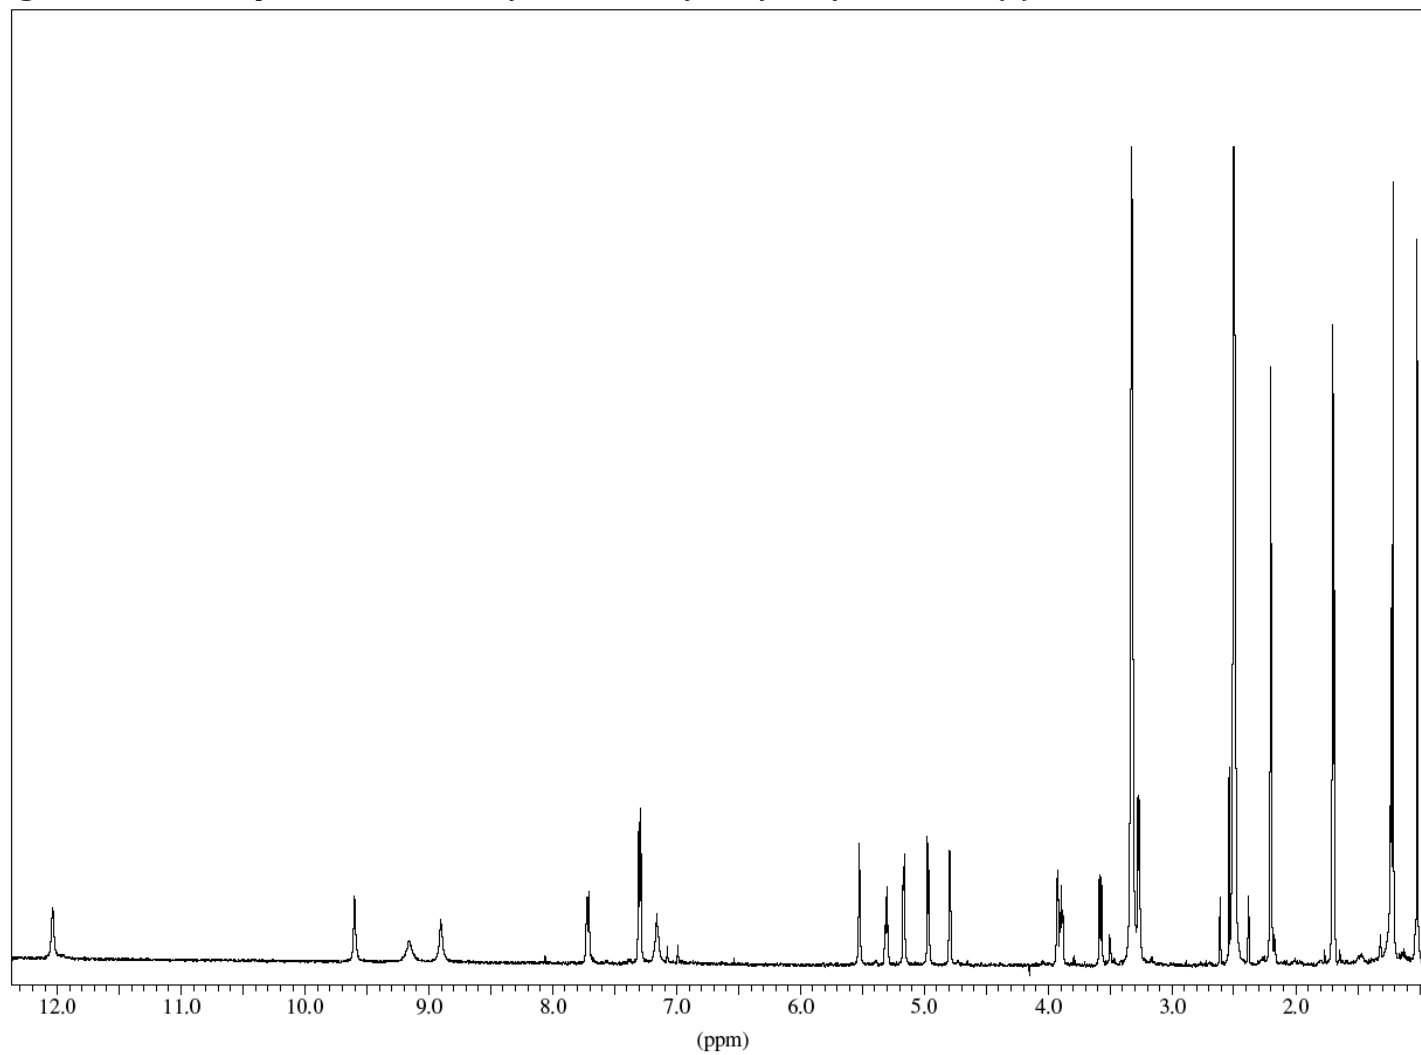

**Figure S8:**  $^1\text{H}$  NMR Spectrum of Desmethyl-4-hydroxynovobiocin (**6**) recorded at 600 MHz in  $\text{DMSO-}d_6$

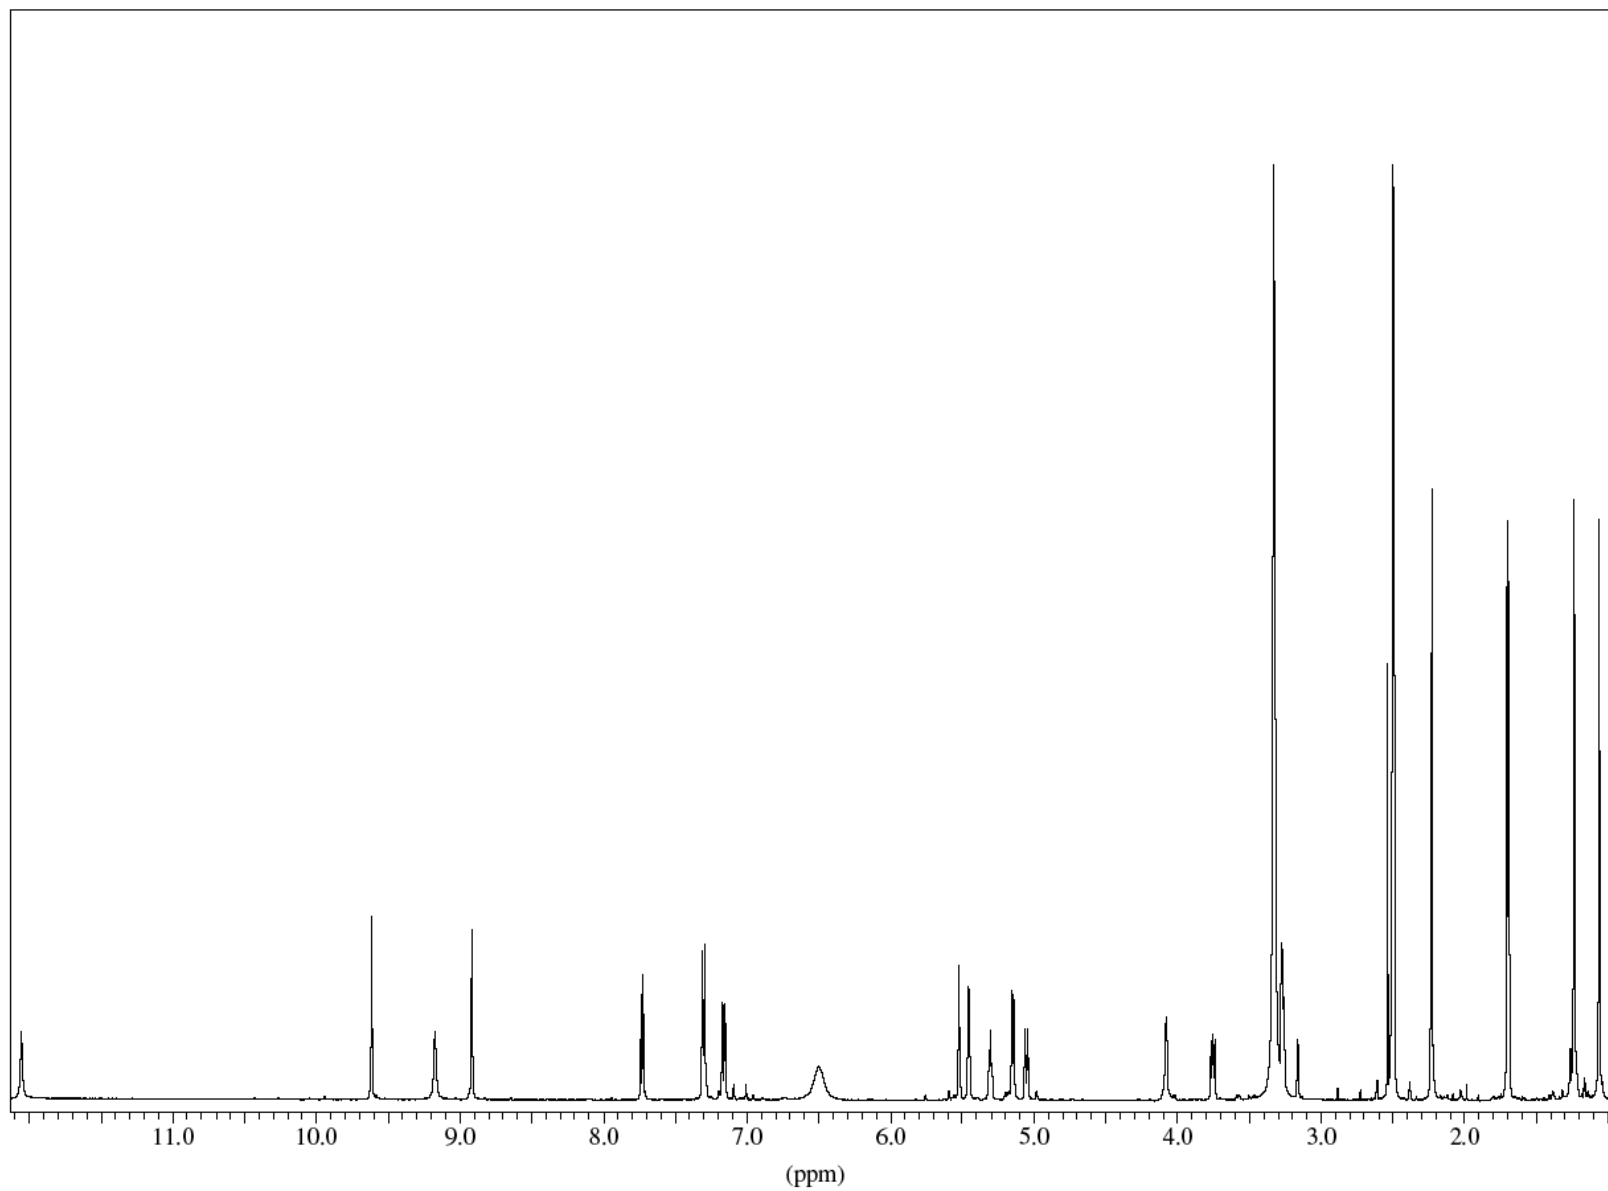

**Figure S9:**  $^{13}\text{C}$  NMR Spectrum of Desmethyl-4-hydroxynovobiocin (**6**) recorded at 150 MHz in  $\text{DMSO}-d_6$

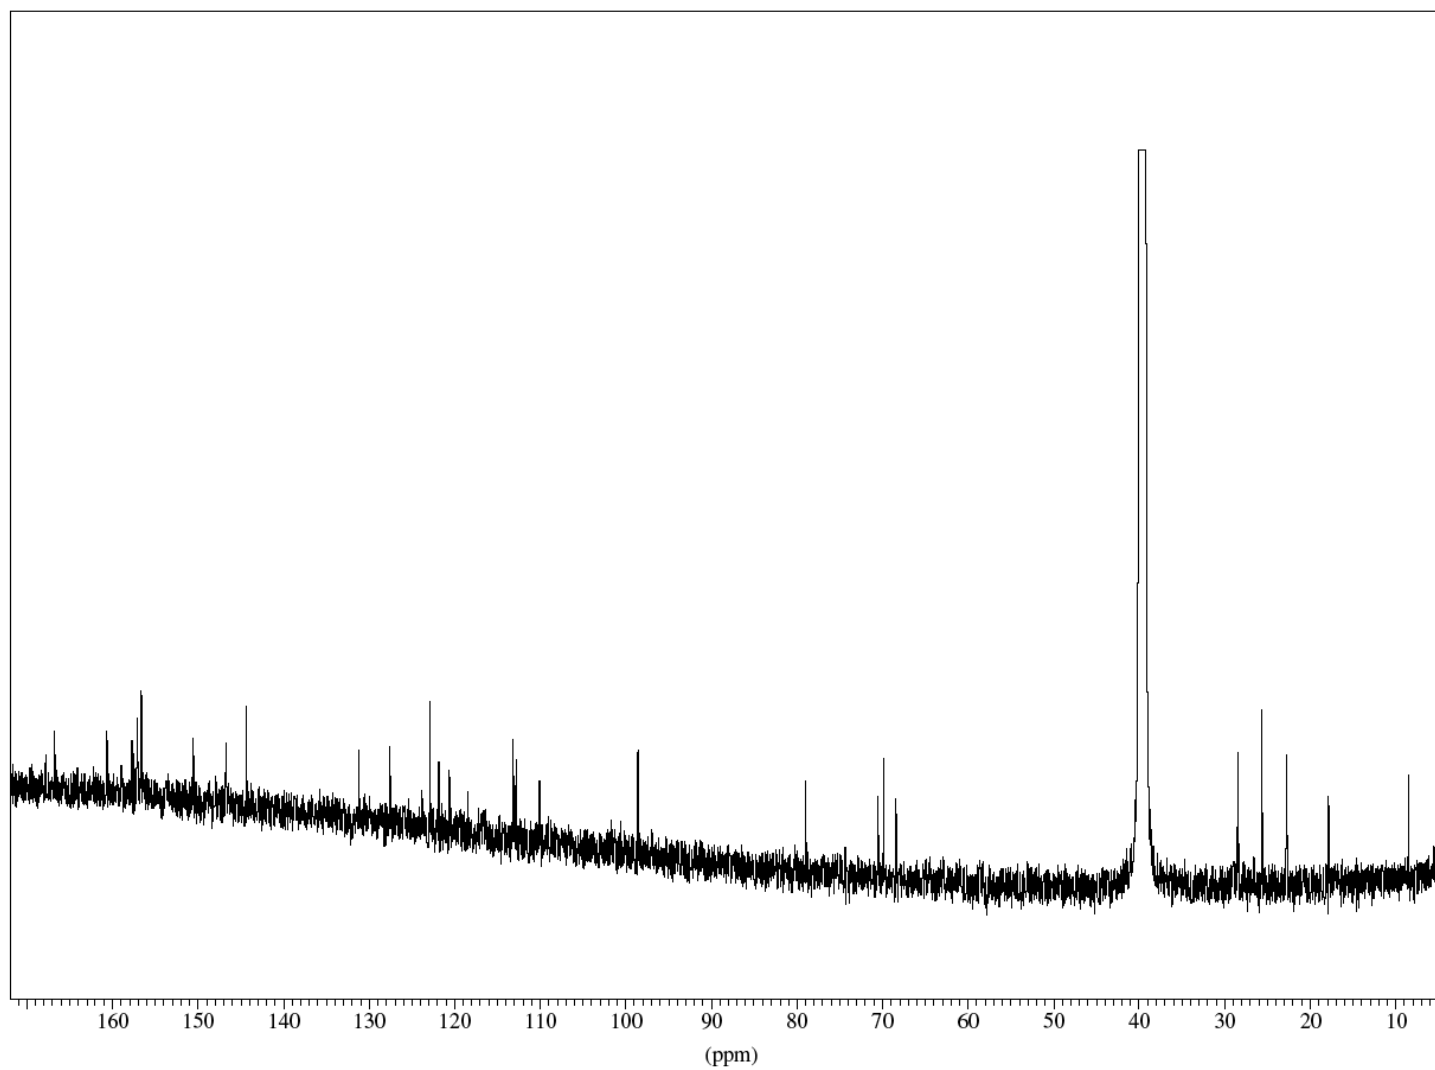

Supplement: pone.0077078.s001.pdf [file pone.0077078.s001.pdf]
